# Supplementary material for: Drug Resistance Prediction Using Deep Learning Techniques on HIV-1 Sequence Data
Source: PubMed Central journal article supplement (PMC7290575; doi:10.3390/v12050560), 2020-05-19
Supplement: viruses-12-00560-s001.pdf [file viruses-12-00560-s001.pdf]

## Supplemental Data

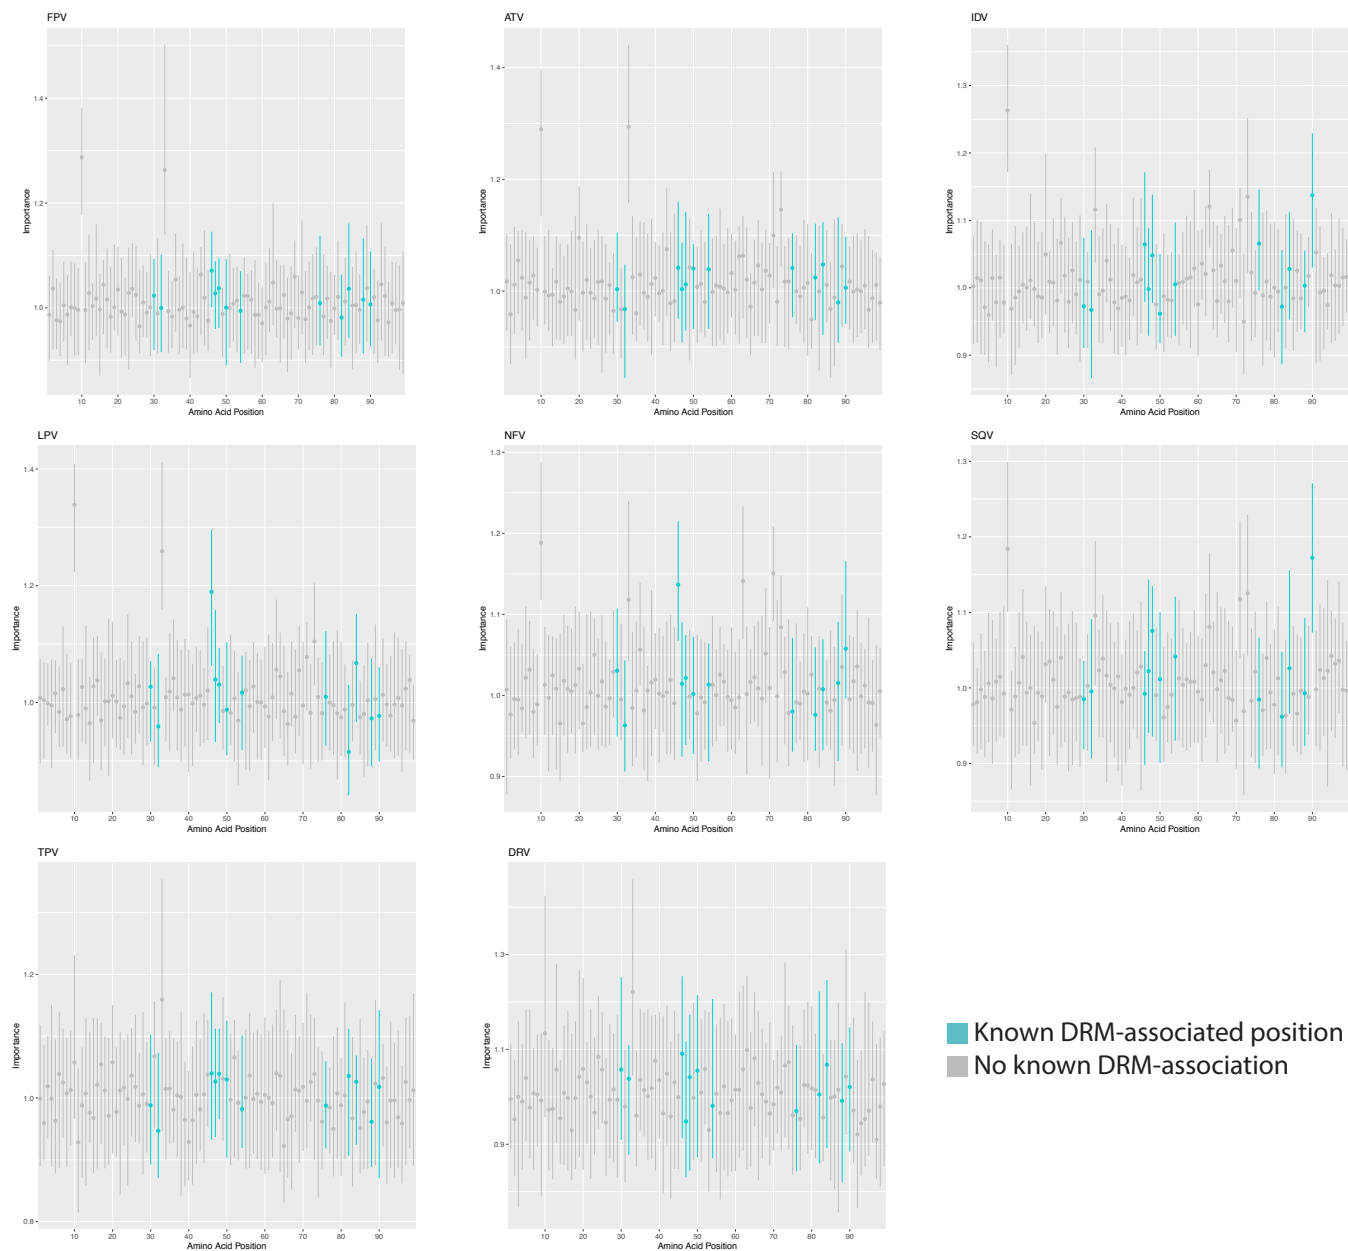

**Figure 1.** Annotated feature importance plots for the MLP classifier for all features across the whole gene - PI. Horizontal axes are amino acid positions ordered 1-99; vertical axes are feature importance (measured as change in 1-AUC).

Abbreviations: FPV=fosamprenavir; ATV=atazanavir; IDV=indinavir; LPV=lopinavir; NFV=nelfinavir; SQV=saquinavir; TPV=tipranavir; DRV=darunavir; PI=protease inhibitor.

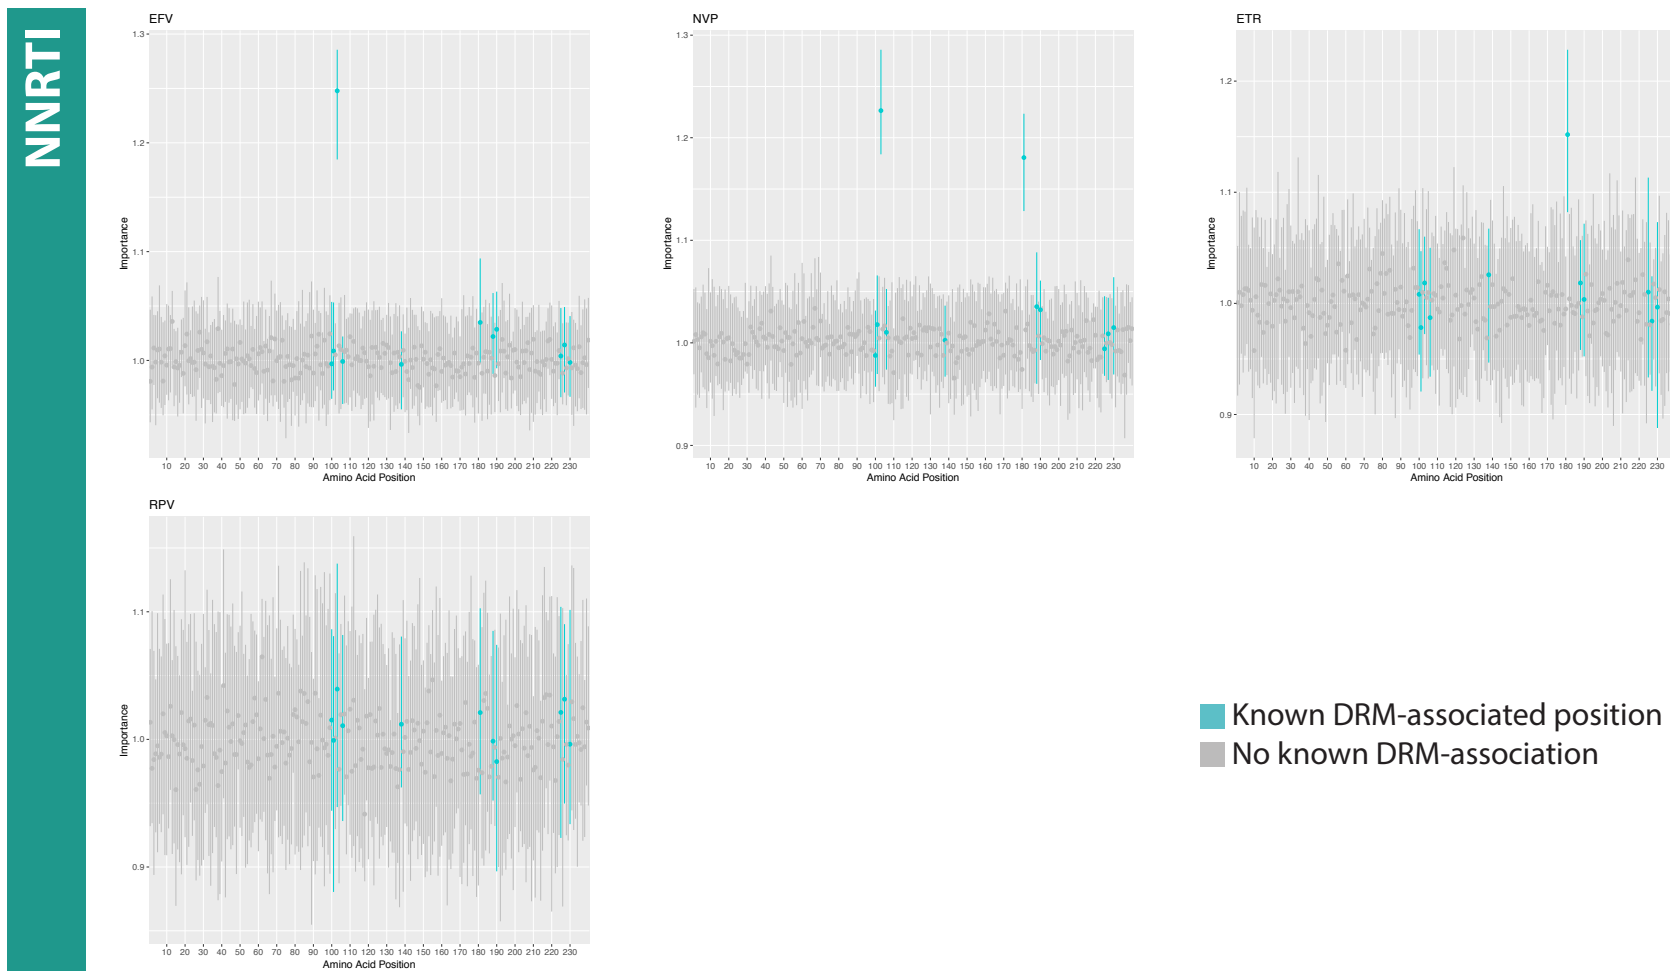

**Figure 2.** Annotated feature importance plots for the MLP classifier for all features across the whole gene - NNRTI. Horizontal axes are amino acid positions ordered 1-240; vertical axes are feature importance (measured as change in 1-AUC).

Abbreviations: EFV=efavirenz; NVP=nevirapine; ETR=etravirine; RPV=rilpivirine; NNRTI=non-nucleotide reverse transcriptase inhibitor.

NRTI

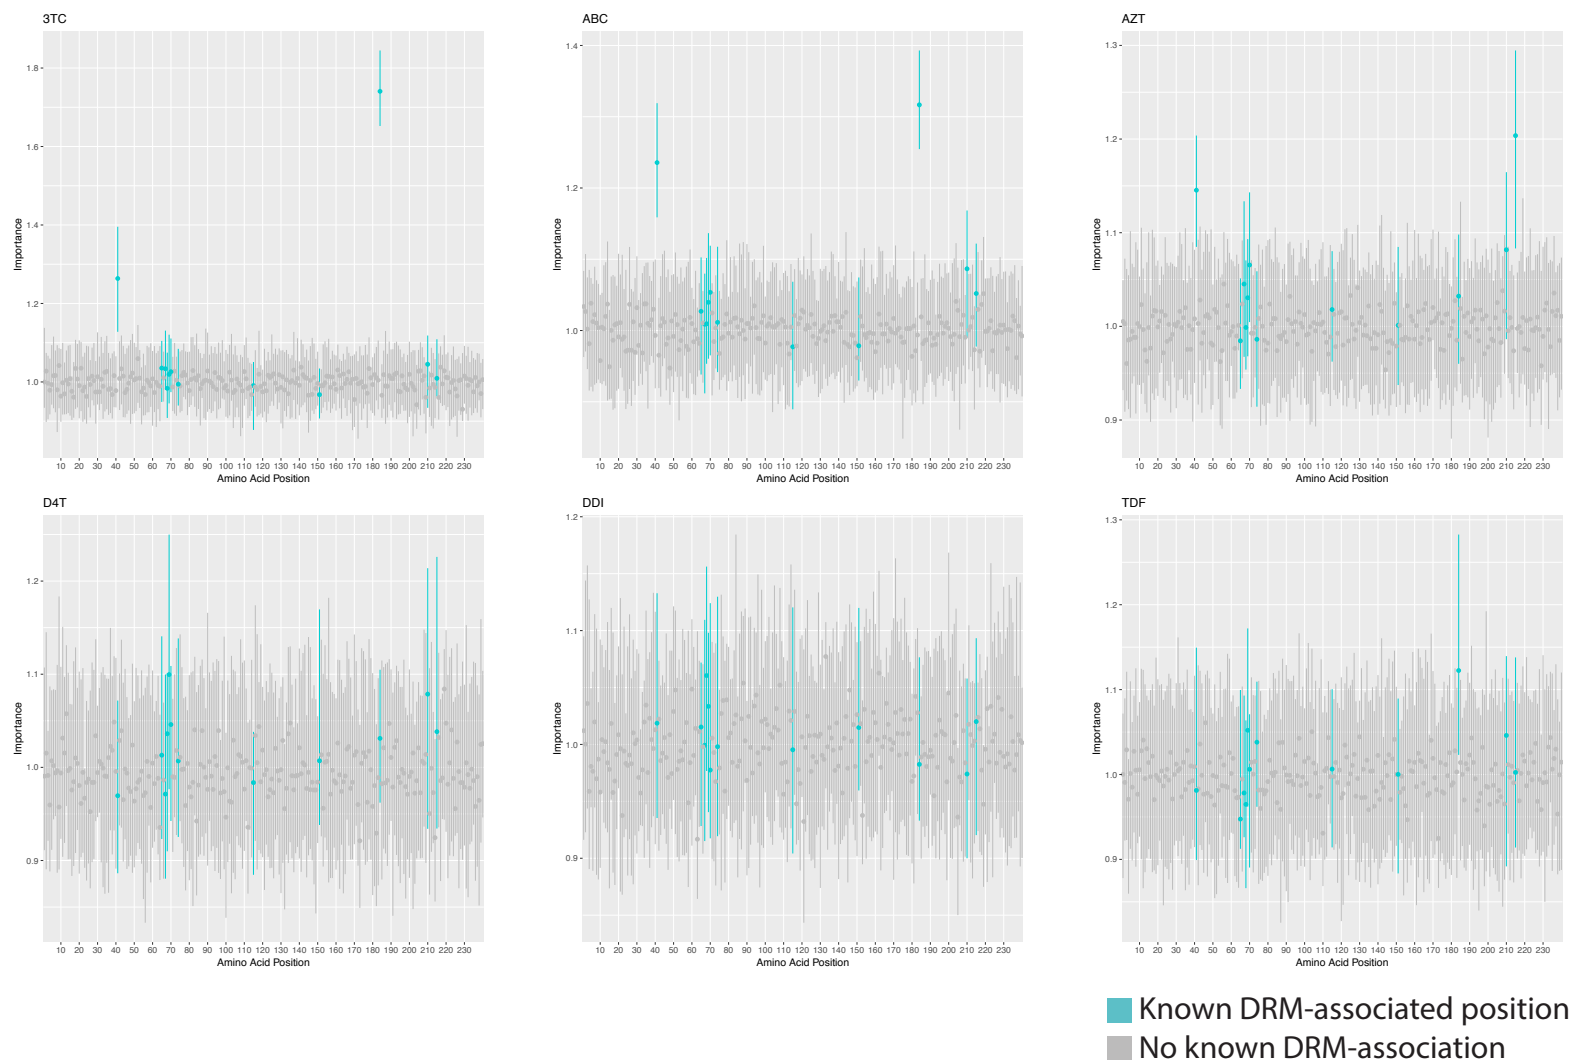

**Figure 3.** Annotated feature importance plots for the MLP classifier for all features across the whole gene - NRTI. Horizontal axes are amino acid positions ordered 1-99; vertical axes are feature importance (measured as change in 1-AUC).  
 Abbreviations: 3TC=lamivudine; ABC=abacavir; AZT=azidothymidine; D4T=stavudine; DDI=didanosine; TDF=tenofovir disoproxil fumarate; NRTI=nucleotide reverse transcriptase inhibitor.

PI

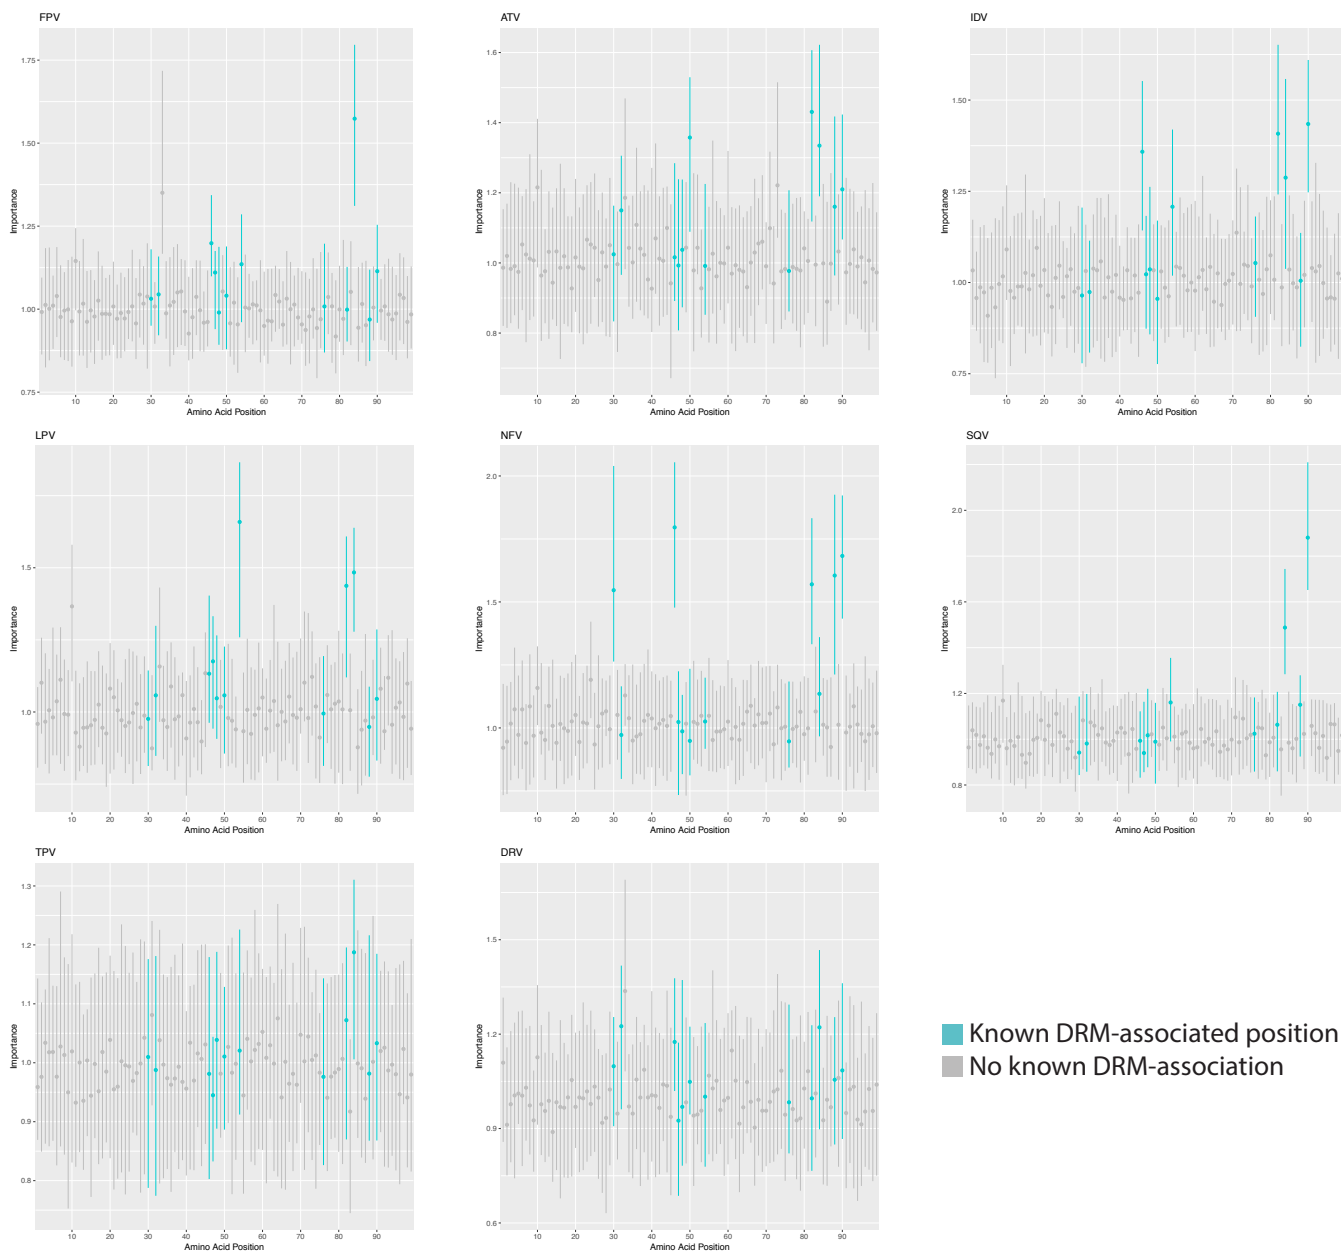

**Figure 4.** Annotated feature importance plots for the BRNN classifier for all features across the whole gene - PI. Horizontal axes are amino acid positions ordered 1-99; vertical axes are feature importance (measured as change in 1-AUC).

Abbreviations: FPV=fosamprenavir; ATV=atazanavir; IDV=indinavir; LPV=lopinavir; NFV=nelfinavir; SQV=saquinavir; TPV=tipranavir; DRV=darunavir; PI=protease inhibitor.

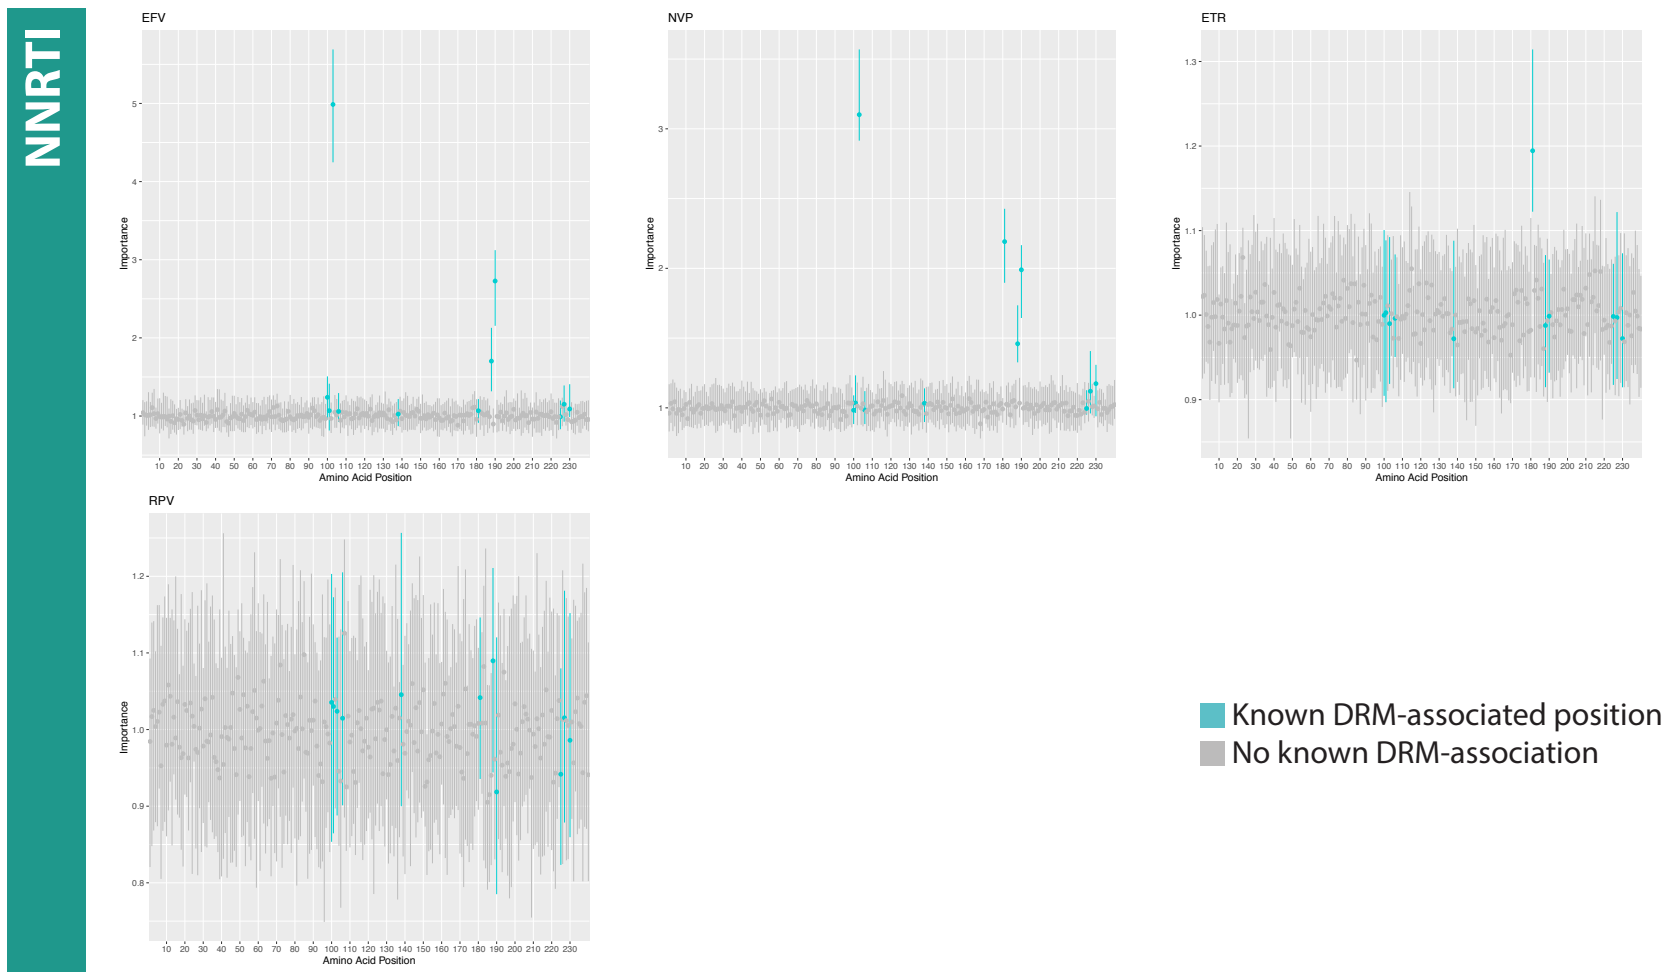

**Figure 5.** Annotated feature importance plots for the BRNN classifier for all features across the whole gene - NNRTI. Horizontal axes are amino acid positions ordered 1-240; vertical axes are feature importance (measured as change in 1-AUC).

Abbreviations: EFV=efavirenz; NVP=nevirapine; ETR=etravirine; RPV=rilpivirine; NNRTI=non-nucleotide reverse transcriptase inhibitor.

## NRTI

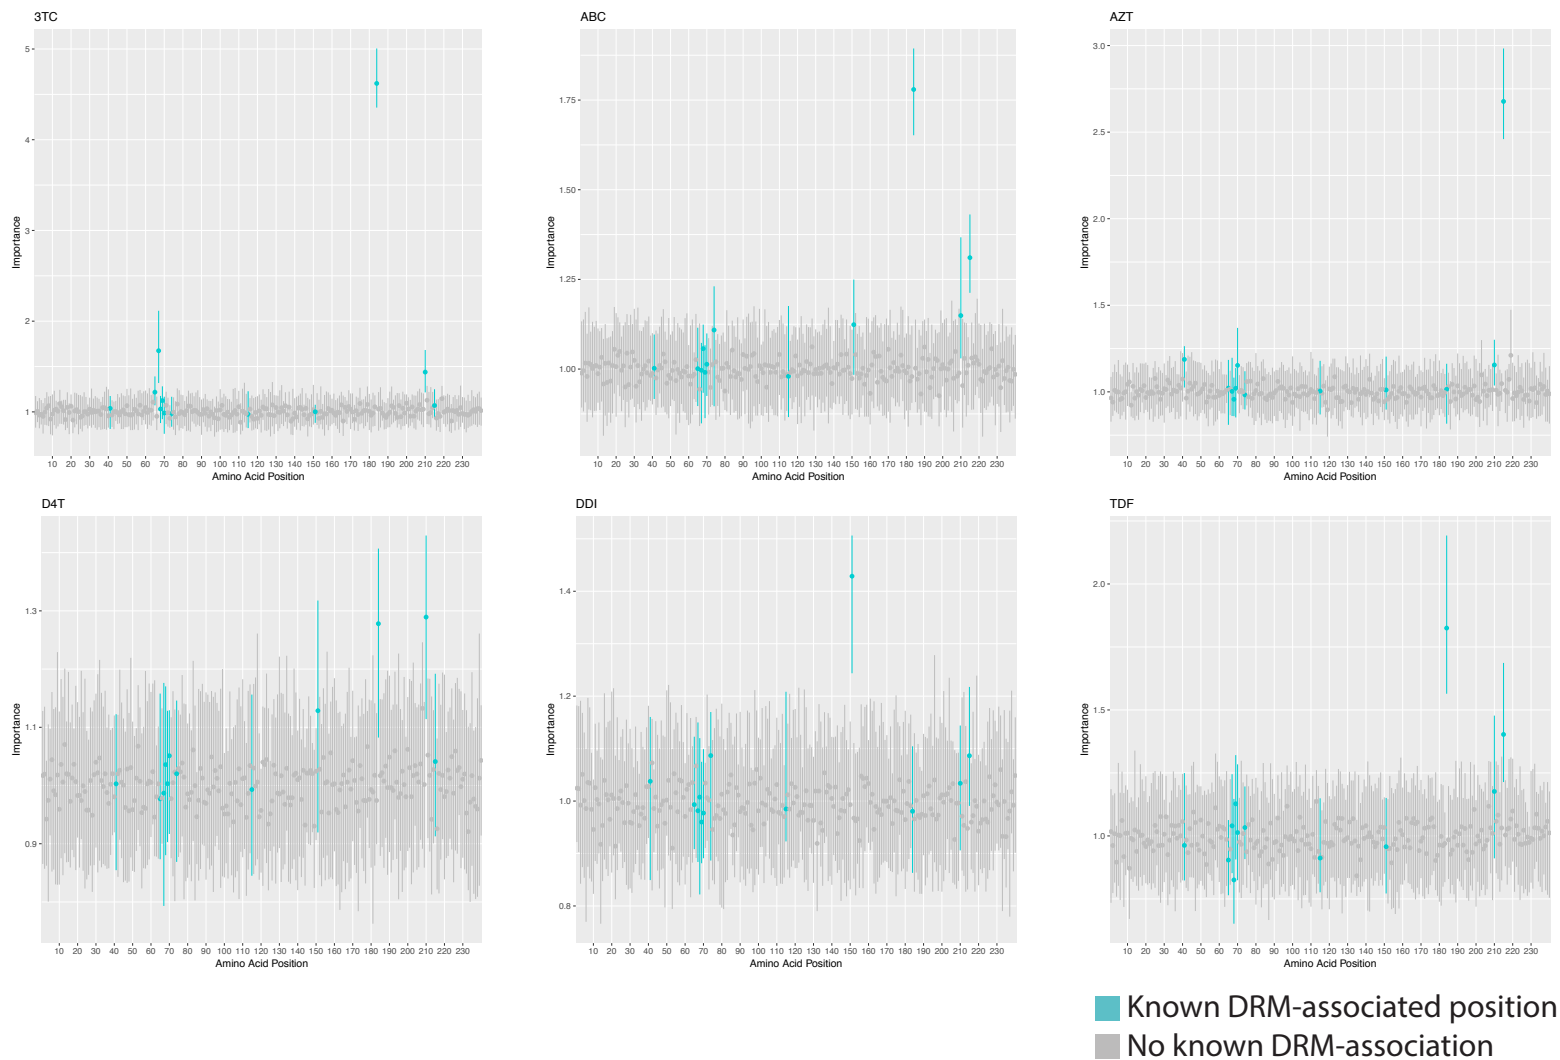

**Figure 6.** Annotated feature importance plots for the BRNN classifier for all features across the whole gene - NRTI. Horizontal axes are amino acid positions ordered 1-240; vertical axes are feature importance (measured as change in 1-AUC).  
 Abbreviations: 3TC=lamivudine; ABC=abacavir; AZT=azidothymidine; D4T=stavudine; DDI=didanosine; TDF=tenofovir disoproxil fumarate; NRTI=nucleotide reverse transcriptase inhibitor.

PI

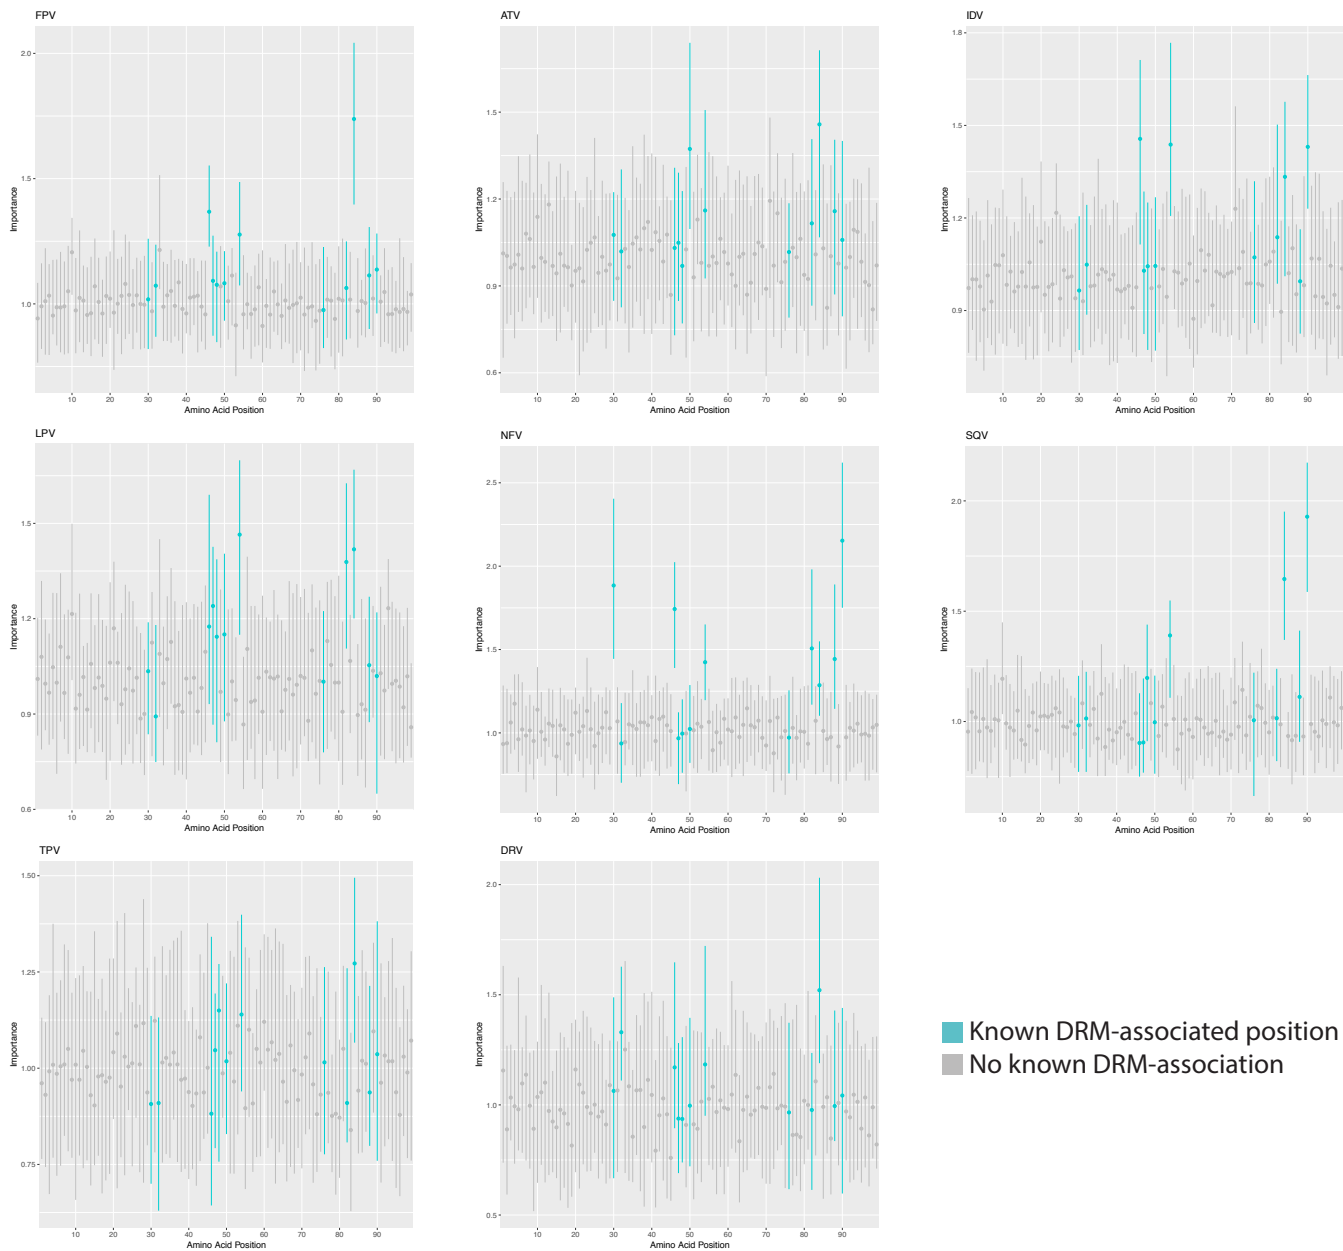

**Figure 7.** Annotated feature importance plots for the CNN classifier for all features across the whole gene - PI. Horizontal axes are amino acid positions ordered 1-99; vertical axes are feature importance (measured as change in 1-AUC).

Abbreviations: FPV=fosamprenavir; ATV=atazanavir; IDV=indinavir; LPV=lopinavir; NFV=nelfinavir; SQV=saquinavir; TPV=tipranavir; DRV=darunavir; PI=protease inhibitor.



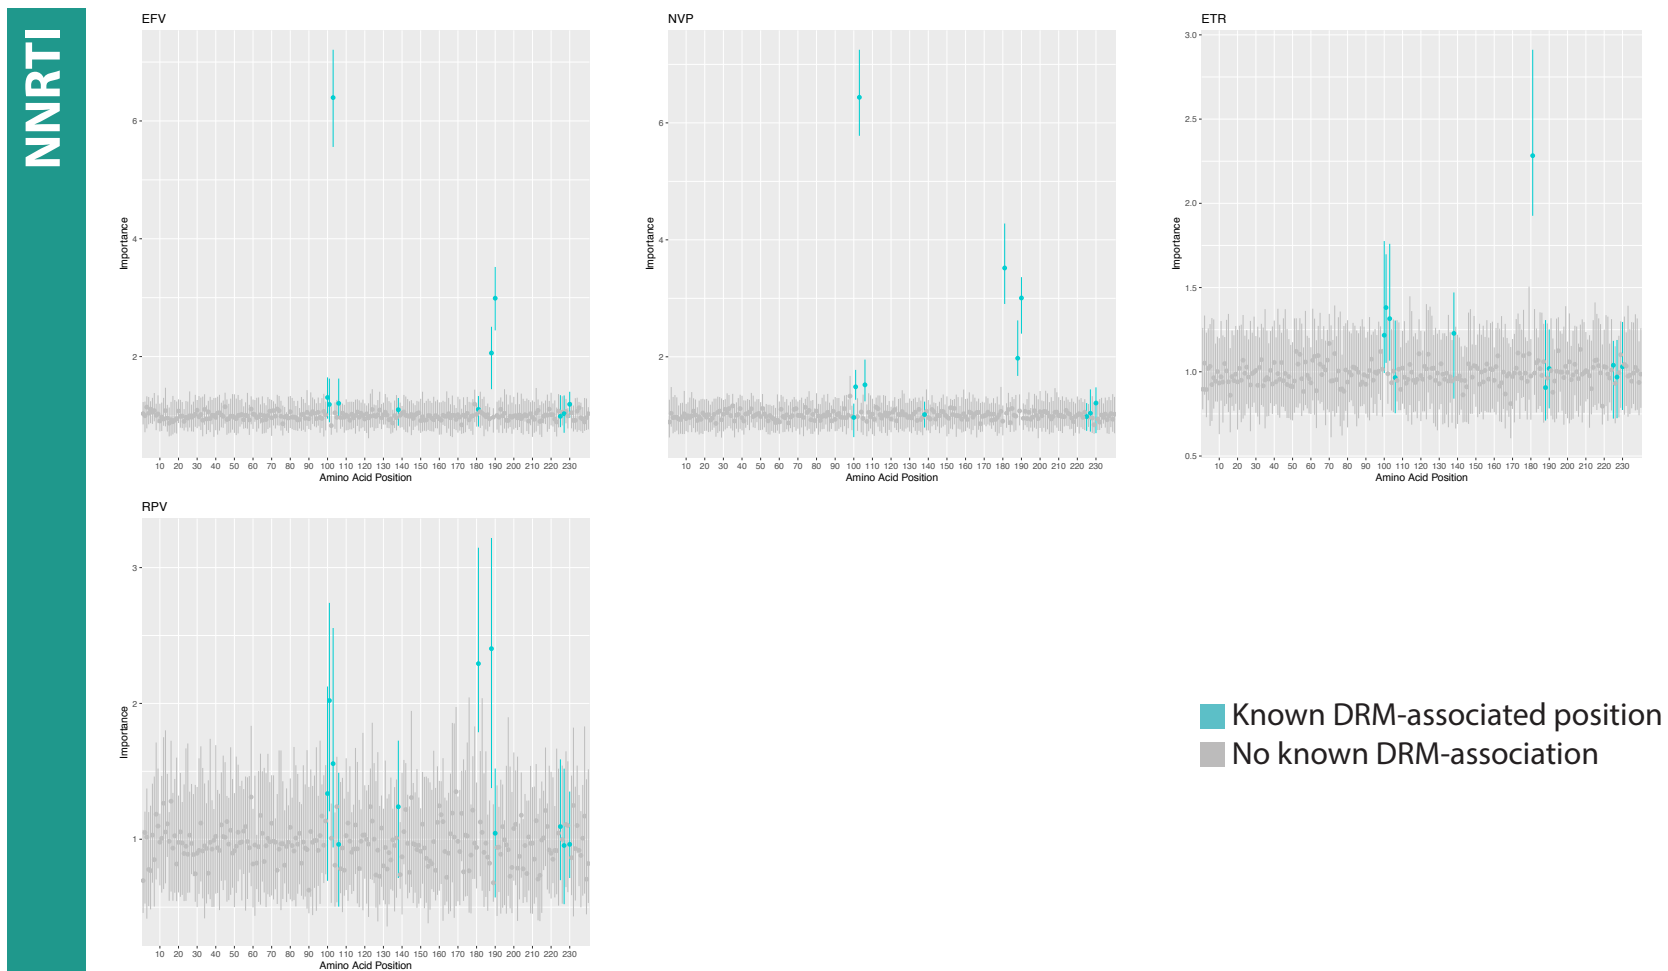

**Figure 8.** Annotated feature importance plots for the CNN classifier for all features across the whole gene - NNRTI. Horizontal axes are amino acid positions ordered 1-240; vertical axes are feature importance (measured as change in 1-AUC).

Abbreviations: EFV=efavirenz; NVP=nevirapine; ETR=etravirine; RPV=rilpivirine; NNRTI=non-nucleotide reverse transcriptase inhibitor.

## NRTI

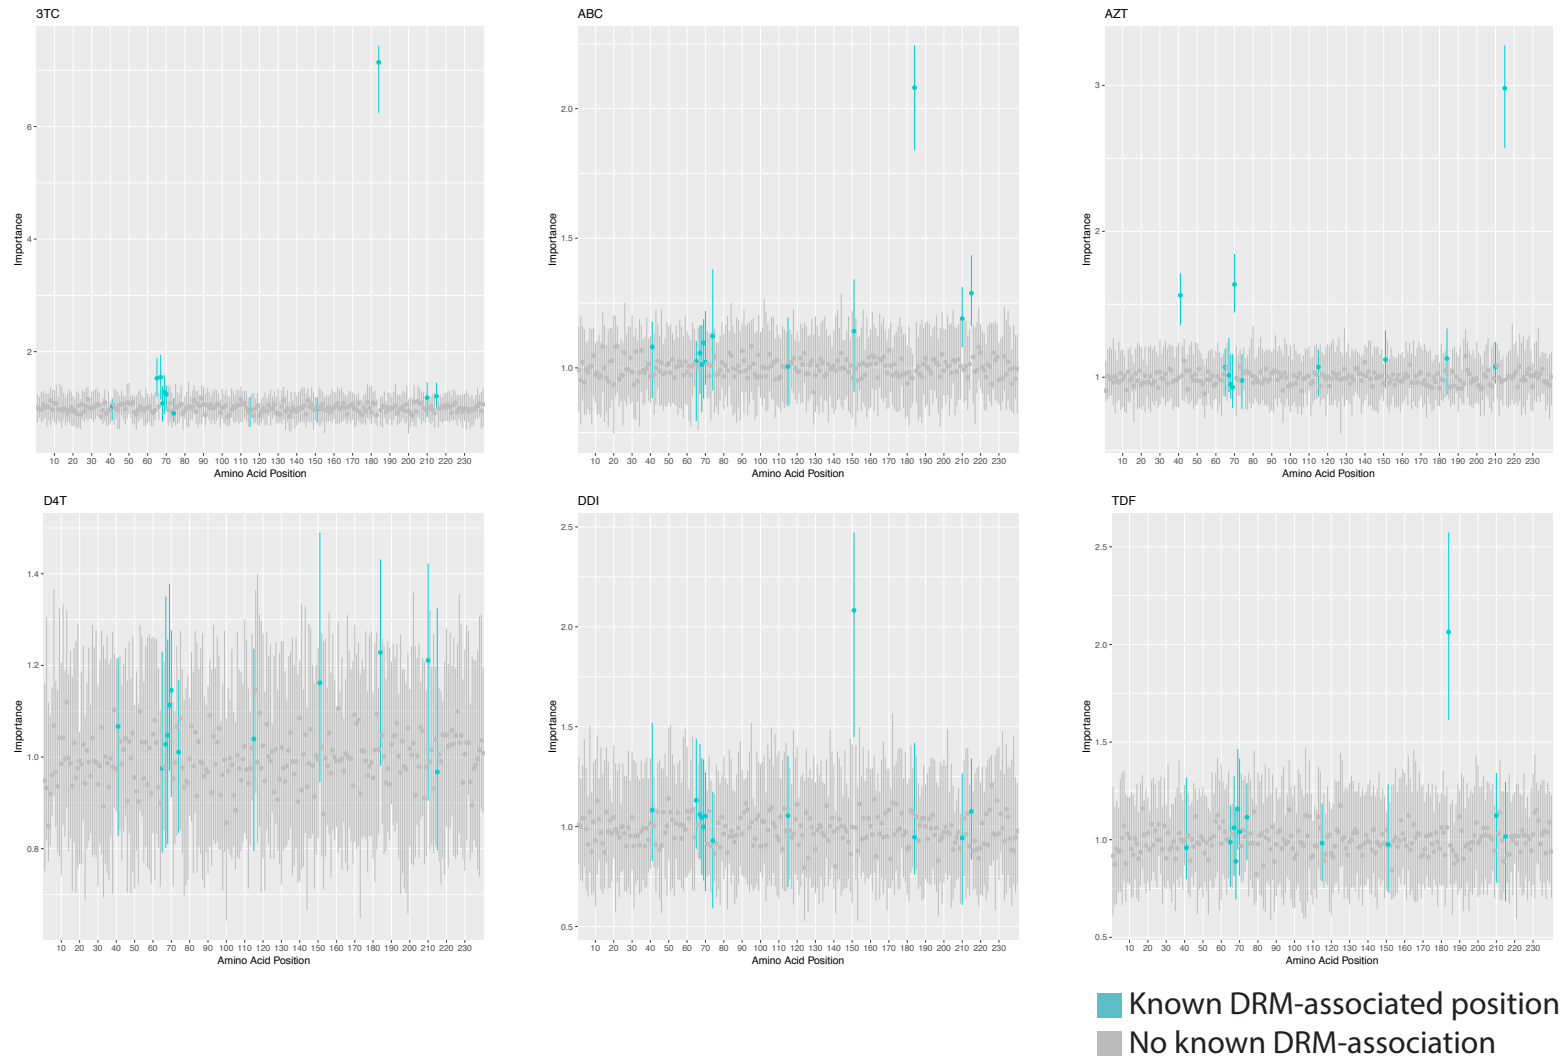

**Figure 9.** Annotated feature importance plots for the CNN classifier for all features across the whole gene - NRTI. Horizontal axes are amino acid positions ordered 1-240; vertical axes are feature importance (measured as change in 1-AUC).  
 Abbreviations: 3TC=lamivudine; ABC=abacavir; AZT=azidothymidine; D4T=stavudine; DDI=didanosine; TDF=tenofovir disoproxil fumarate; NRTI=nucleotide reverse transcriptase inhibitor.

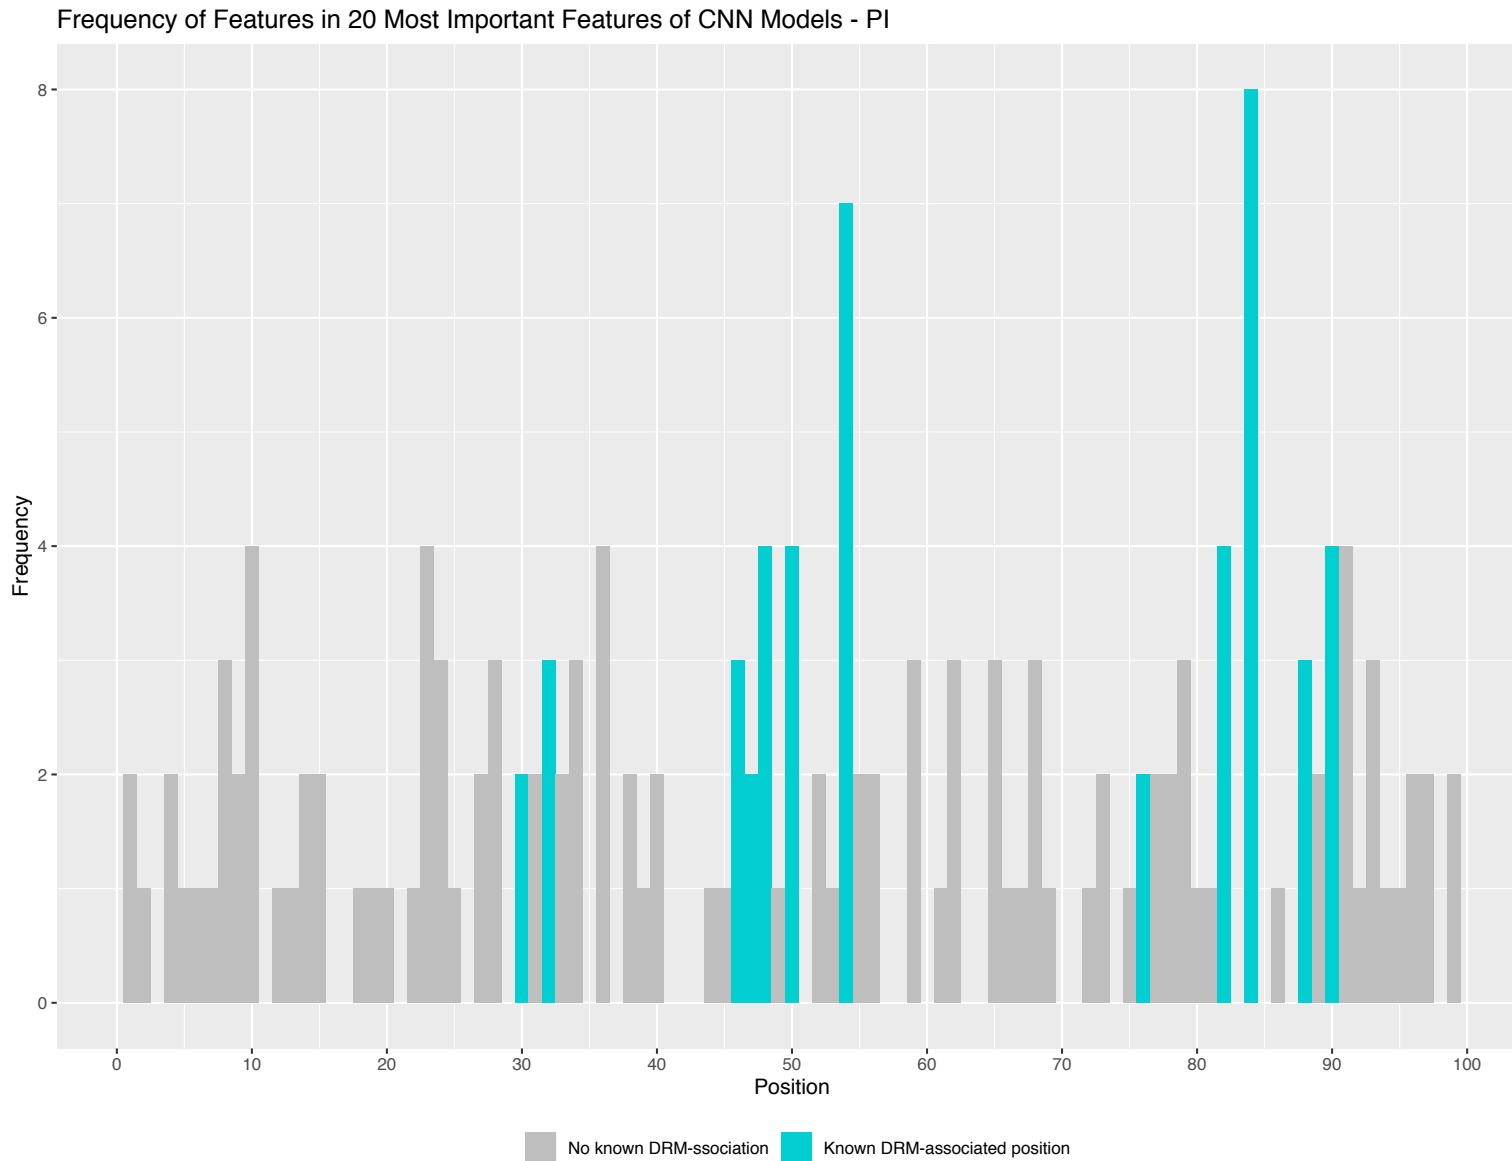

**Figure 10.** Histogram denoting the frequency of amino acid positions among the 20 most important features for CNN models in PI datasets. *Abbreviations: CNN=convolutional neural network, PI=protease inhibitor, DRM=drug resistance mutation.*



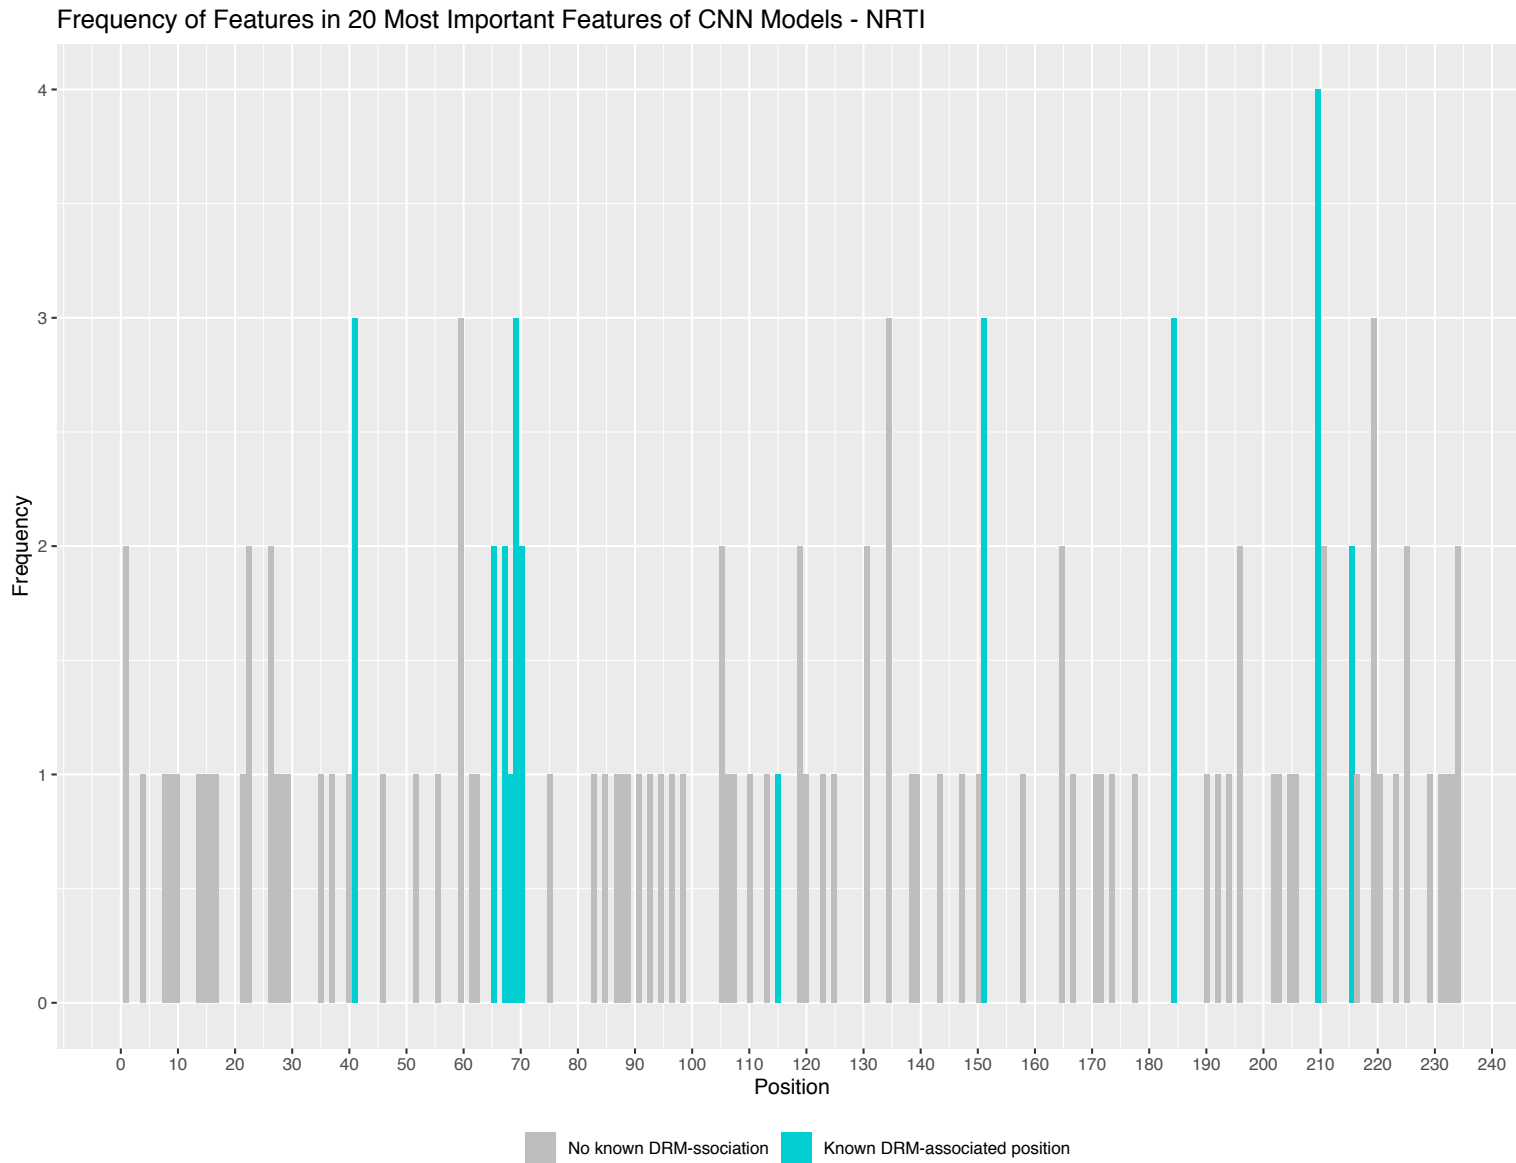

**Figure 12.** Histogram denoting the frequency of amino acid positions among the 20 most important features for CNN models in NRTI datasets. *Abbreviations: CNN=convolutional neural network, NRTI=nucleotide reverse transcriptase inhibitor, DRM=drug resistance mutation.*
